# Supplementary material
Source: Royal Society of Chemistry journal article supplement (https://www.rsc.org/suppdata/p2/1999/2203/901495k.doc)

**Supplementary Publication**

**The Mode of Transmission of Electrical Effects**

Marvin Charton*†§ and Barbara I. Charton‡

*Chemistry Department, Pratt Institute, Brooklyn, NY 11205*†

*Library, St. Johns University, 8000 Utopia Parkway, Jamaica, NY 11439*‡

The dependence of substituent electrical effect transmission on substituent - reaction site distance and on charge on reactant and product or transition state has been studied in the systems X-G-Y and X-Y where X is a variable substituent, Y a reaction site, and G a skeletal group. Reaction types studied were molecule-molecule (MM), molecule-ion (MI), and molecular ionization (Mi). MM reactions include proton transfer equilibria (pKa's) of compounds with Y = CO2H, OH, SO2NH2, NR2H+, azarenes, PO2(OH)-, and SH; gas phase ΔGacid values for Y = CO2H and OH, and proton affinities for NR2H+, proton transfer reaction rates for XGCO2H with Ph2CN2, and hydrogen bonding equilibria for XGCN (pKHB). MI include rates of base catalyzed ester hydrolysis, nucleophilic substitution of PhCOCH2Br by XGCO2-, and protodetritiation of T-substituted arenes. Mi reactions were solvolyses of XGCHLgMe (Lg is a leaving group) and XGCMe2Cl. The measure of electrical effect magnitude used was L, the coefficient of the localized (field and/or inductive) effect obtained from correlation of appropriate data sets with linear free energy relationships. The substituent - reaction site distance was parameterized by n, the number of bonds between the substituent and the nearest atom of the reaction site undergoing bond change (Y1). Correlations of L with 1/n2 and 1/n; and of log L with log n by simple linear regression analysis determined the dependence of L on n. Data sets with very large values of θ, the angle between the X-G bond and the line joining X and Y1, were excluded . Data in aqueous - organic solvent mixtures can be combined into a single data set regardless of the solvent composition, probably due to preferential solvation by water. The results do not agree with the Kirkwood-Westheimer model for MI, Mi, and some MM reactions all of which show a dependence on 1/n rather than 1/n2. They support a modified field effect as the mode of transmission. This model differs from the Kirkwood-Westheimer model m seeming to depend on the charge difference between initial and final states.

**Appendix I. Equations used to obtain ρ, C, and L.**

ρ values are obtained from correlation of the QX values with the Hammett equation,

or the modified Yukawa - Tsuno (MYT) equation1,2

where σX is σC50, a composite substituent constant composed of equal parts of σl and σd for 4-substituted and σm for 3-substituted benzene derivatives. Correlation of the QX with the L equation3,4

the LD equation,

the CR equation5,6

or the LDR equation7,8

provides L and C values.

The σl, σd, and σe electrical effect substituent constants are "pure" parameters, that is they represent a single effect. σl is a measure of the localized (field and/or inductive) electrical effect. σd is a measure of the intrinsic delocalized (resonance) electrical effect, that is, the delocalized effect observed when the electronic demand is zero. σe accounts for the sensitivity of the substituent to the electronic demand of the reaction site.

In some cases L, C, and ρ values were obtained from correlations of rate constants with variations of the LDR, LD, CR, MYT, L, and Hammett equations to which a term in the independent variable τ, defined as 100/TK where TK is the absolute temperature. In other cases L, C, and ρ values were derived from correlations of data with variations of these equations which included a term in the steric parameter υ9-12; or in the intermolecular force parameters μ (the bond moment parameter), and α (the polarizability parameter).

**References**

1. M. Charton in *The Chemistry of Arsenic, Antimony and Bismuth*, ed., S. Patai, Wiley, New York, 1994, p. 367.

2. M. Charton in *The Chemistry of Organic Germanium, Tin and Lead Compounds*, ed. S. Patai, Wiley, Chichester, 1995, p. 603.

3. M. Charton, *Prog. Phys. Org. Chem.*, 1981, **13**, 119.

4. M. Charton in *Chemistry of the Functional Groups; Supplement C*, ed. S. Patai, Wiley, New York, 1983, p. 269.

5. M. Charton in *The Chemistry of Sulfenic Acids, Esters and Derivatives*, ed. S. Patai, Wiley, New York, 1990, p. 657.

6. M. Charton in *The Chemistry of Dienes and Polyenes*, ed. Z. Rappoport, Wiley, Chichester, 1997, p. 683.

7. M., Charton, *Prog. Phys. Org. Chem.*, 1987, **16**, 287.

8. M. Charton in *The Chemistry of the Functional Groups. Supplement A, The Chemistry of Double Bonded Functional Groups.*, Vol. **2**, Part 1, ed. S. Patal and Z. Rappaport Wiley, New York, 1989, p. 239.

9. M. Charton, *Prog. Phys. Org. Chem.*, 1973, **10**, 81.

10. M. Charton in *Design of Biopharmaceutical Properties Through Prodrugs and Analogs*, ed. E.B. Roche American Pharmaceutical Society, Washington, D.C., 1977, p. 228.

11. M. Charton, *Topics in Current Chem.*, 1983, **114**, 57.

**Table 1.** L values used in correlations.

**CA1.** L, XGCO2H, pKa, aq., 25o. L,G; 4-PnOCH2, 0.317; CC, 2.40; E-2-Vn, 2.41; 4-Pn, 0.963; 4-PnCH2, 0.557; none, 9.63; 4-Pn, 0.976; 4-PnSCH2, 0.359; E-2-cPrn, 1.87; 4-PnS(O)CH2, 0.221; 4-PnS(O)2CH2, 0.258; 4'-Pn-E-2-cPrn, 0.161; CH2, 4.05; 1-Vn, 4.14; E-4-cHxn, 0.747; 5,2-Fn, 1.37; 5,2-Tn, 1.24; 5,2-Spn, 1.27; 5,2-Tpn, 1.18; 5,2-Prn, 1.40; E-4-Pn-2-Vn, 0.446; E-3-Pn-2-Vn, 0.439; 3-PnOCH2, 0.273; 4-PnOCH2, 0.352; 4-PnSeCH2, 0.399; 3-PnSCH2, 0.174; 3-PnS(O)2CH2, 0.243; 3-PnSeCH2, 0.288; CHMe, 4.04; E-CX=CHPh, 4.25; E-CX=CHMe, 3.55; CX=CMe2; 3.56; E-MeC=CXH, 2.58; E-CH=CXMe, 2.84; E-@-VnCH2; 1.18.

**CA2.** L, XGCO2H, pKa, aq. EtOH, 25o. G, L, φM: 5,2-Fn-E-2-Vn, 1.13, 0.236; 4-Pn, 1.57, 0.236; 4-PnCH2, 0.793,.0.236; 4-PnCMe2CH2, 0.433, 0.236; E-2-cPrn, 2.82,.0.236; 3,1-Azn, 1.61,.0.236; E-2-Vn, 2.89,.0.236; 4,1-bc[2.2.2]Ocn, 1.44,.0.236; 6,2-s[3.3]Hpn. 0.738,.0.281; 4,1-Cbn, 1.43,.0.281; 3,1-Adn, 1.47, 0.236; 4,1-cHxn, 1.10, 0.236; CH2, 4.52, 0.281; 4,1-bc[2.2.2]Ocn, 1.56, 0.236; 4-CH2Pn, 0.905, 0.236; 5,2-Bfn, 1.02, 0.236; 5,2-Idn, 1.42, 0.236; 4'-Pn-5,2-Fn, 0.450, 0.236; 3'-Pn-5,2-Fn, 0.542, 0.236; 3,1-bc[2.1.0]Pen, 2.25, 0.236; (CH2)3, 1.17, 0.236; 4'-PnS-5,2-Fn, 0.390, 0.236; 4'-PnS(O)2-5,2-Fn, 0.204, 0.236; none, 12.0, 0.610; CH2, 5.44, 0.610; 3-Pn, 1.39, 0.163; 3-Pn, 1.60, 0.519; 3-Pn, 1.59, 0.696; 4-Pn, 1.42, 0.163; 4-Pn, 1.74, 0.519; 4-Pn, 1.59, 0.696; 4-PnCOCH2CO, 0.416, 0.689; 4'-Pn-E-2-Vn, 0.809, 0.524; 4,1-Nn, 1.75, 0.236; 5,1-Nn, 1.13, 0.236; 6,1-Nn, 0.881, 0.236; 6,2-Nn, 0.857, 0.236; CH2, 4.47, 0.236; 7,2-Nn, 0.857, 0.236; 3,1-Adn, 1.39, 0.236; 4,2-Nn, 1.14,. 0.236; 4'-PnS-E-2-Vn, 0.709, 0.236; 4'-PnS(O)-E-2-Vn, 0.279, 0.236; 4'-PnS(O)2-E-2-Vn, 0.380, 0.236; 4-PnCH2CH2, 0.405, 0.236; 4'-Pn-E-2-cPrn, 0.562, 0.236; CH2-3-Pn, 0.727, 0.236; 7,1-Nn, 0.634, 0.236; 3,1-Nn, 1.38,0.236; 3-Pn, 1.58, 0.236.

**CA3.** L, XGCO2H, pKa, 80 % aq. MeOCH2CH2OH, 25o. G, L: 5,2-Fn, 1.86; 4-Pn, 1.89; E-2-Vn, 3.41; 4-CH2Pn, 0.964; CH2, 4.58; 5',2'-Fn-E-2-Vn, 1.37; E-4"-PnS-5',2'-Fn-2-Vn, 0.228; 5,2-Tn, 2.10; 5,2-CH2Tn, 0.928; none, 11.8; E-4"-PnS(O)2-5',2'-Fn-2-Vn, 0.135; E=4"-Pn-5',2'-Fn-2-Vn, 0.507; 6,2-Pnn, 0.631; 4,1-bc[2.2.2]Ocn, 1.20.

**CA4.** L, XGCO2H, pKa, aq. MeOH, 25o. G, L, φM: none, 7.47, 0.309; CH2, 4.15, 0.309; 4,1-bc[2.2.2]Ocn, 0.982, 0.309; 4,1-bc[2.2.1]Hpn, 1.37, 0.309; 3-Pn, 1.66, 0.309; 4-Pn, 1.39, 0.309; 0.309; E-4-cHxn, 0.774, 0.309; CH2, 3.74, 0.130; 4,1-bc[2.2.2]Ocn, 1.25, 0.130; 4,1-bc[2.2.1]Hpn, 1.06, 0.130; 4"-Pn-E-2'-CH=N-4-Pn, 0.125, 0.692; 4"-Pn-E-2'-N=CH-4-Pn, 0.271, 0.956.

**CA5.** L, XGCO2H, pKa, MeOH, 25o  G, L: none, 9.20; CH2, 3.60; 4,1-bc[2.2.2]Ocn, 1.05; 3-Pn, 1.49; 4-Pn, 1.45; CH2CH2, 1.29.

**CA6.** L, XGCO2H, pKa, EtOH, 25o. G, L: none, 11.7; CH2, 4.00; 4-Pn, 1.68; 3-Pn, 1.75.

**CA7.** L, XGCO2H, pKa, Me2SO, 25o. G, L: none, 17.7; CH2, 5.87; 4-Pn, 2.66; 3-Pn, 2.75.

**CA8.** L, XGCO2H, pKa, aq. dioxan, 25o. G, L, φM: 4-PnSCH2, 0.703, 0.175; 4-PnS(O)CH2, 0.447, 0.175; 4-PnS(O)2CH2, 0.561, 0.175; 4-Pn, 1.38, 0.127; 4-Pn, 1.56, 0.200; 4-Pn, 1.56, 0.339; 4-Pn, 1.59, 0.500; CH2, 4.15, 0.0486; CH2, 4.50, 0.120; CH2, 4.66, 0.235; CH2, 5.02, 0.450, 3-PnCC, 0.714, 0.0992; 3-PnSCH2, 0.510, 0.175; 3-PnS(O)CH2, 0.319, 0.175; 3-PnS(O)2CH2, 0.477, 0.175; 3-Pn, 1.19, 0.127; 3-Pn, 1.30, 0.200; 3-Pn, 1.42, 0.339; 3-Pn, 1.44, 0.500; 4-PnCC, 0.835, 0.0992.

**CA9.** L, XGCO2H, pKa, 12.1 mole % aq. aq. BuOCH2CH2OH, 25o. G, L: 4-Pn, 1.55; 4',4-PnPn, 0.541; 4',4-PnPn, 0.407; 5',2'-Spn-5,2-Spn, 0.560; 5,2-Tn, 1.63; 5,2-Spn, 1.68.

**CA10.** L, XGCO2H, ΔGacid, , (g), 25o. L, G: none, 46.7; CH2, 26.1; CH2CH2, 11.5; 3-Pn, 13.6; 4-Pn, 15.8; 4,1-bc[2.2.2]Ocn, 12.4; 4,1-bc[2.2.2]Ocen, 13.1.

**CA11.** L, XGCO_2H, pKa, Me2NCHO, 25o. CH2, 6.48, 3-Pn, 2.48, 4-Pn, 2.48, 5,1-Nn, 1.98, 6,2-Nn, 1.02; 7,1-Nn, 1.05.

**CA12.** L, XGCO_2H, pKa, MeCN, 25o. G,L: CH2, 5.81, 4-Pn, 2.32, 3-Pn, 2.15, none,12.6, 7,2-Nn, 0.995.

**HA1.** L, XGOH, pKa, aq. EtOH, 25o. G, L, φM: 4,1-Nn, 3.94, 0.236; 5,1-Nn, 2.14, 0.236; 6,2-Nn, 2.23, 0.236; 4'-PnS(O)2Pn-4, 0.483, 0.236;4"-Pn-E-2'-Vn-4-Pn, 0.383, 0.282; 4'-PnCCPn-4, 0.307, 0.282; 4-Pn, 3.22, 0.236; 4"-Pn-4'-PnPn-4, 0.822, 0.236; 3'-Pn-N=N-4,1-Nn, 0.859, 0.236; 4'-Pn-N=N-Pn-4, 0.839, 0.236; 3-Pn, 2.72, 0.228; 4-Pn, 3.67, 0.228; 3-Pn, 2.99, 0.298; 4-Pn, 3.78, 0.298; 3-Pn, 2.85, 0.696; 4-Pn, 3.47, 0.696; 3-Pn, 3.21, 0.855; 4-Pn, 3.43, 0.855.

**HA2.** L, XGOH, aq., 25o. G, L: 4-Pn, 2.77; none, 16.4; 4-PnCHCF3, 1.01; 4-PnC(OH)CF3, 1.11; CH2, 7.32; 4,1-Nn, 3.30; 3,1-Nn, 2.40; 4,2-Nn, 2.14; 2,3-Ttr, 3.65, 2-Pn, 4.06; 3-Pn, 2.30.

**HA3.** L, XGOH, ΔGacid, 25o, G, L: none, 59.8; CH2, 44.3; 1-Vn, 34.8; 2-Vn, 49.6; 3-Pn, 19.0; 4-Pn, 22.5.

**HA4.** L, XGMZ=NOH, aq., 25o. G, Z, L: 3-PnN=N-, H, .554; 4-PnN=N-, H, ..587; 4-Pn, H, .933; none, Me, 4.80; none, Ph, 4.71; CH2(C=O)C, Me, 1.64; none, H, 5.90.

**PA1.** L, XG[PO2(OH)]-, pKa, aq., 25o. G, L: none, 7.60; CH2, 3.82; 3-Pn, 1.41; 4-Pn, 1.17.

**AB1.** L, XGNH3+, pKa, aq., 25o. G, L: none, 24.9; CH2, 9.16; CH2CH2, 4.82; 4-Pn, 3.74; 4-Pn, 3.87; 4-Pn, 3.81; 4-PnCH2, 1.09; 3-PnCH2, 1.00; 4-PnCH2CH2, 0.400; 4,1-Nn, 2.81; 3,1-Nn, 2.93; 4,2-Nn, 2.32; 3-Pn, 2.97; 2-Pn, 4.30.

**AB2.** L, XGNH3+, pKa, aq. EtOH, 25o G, L, φM: none, 28.9, 0.236; 4-Pn, 4.82, 0.282; 3-Pn, 4.60, 0.282; 4'-PnCCPn-4, 0.360, 0.236; 4"-Pn-E-2'-Vn-4-Pn, 0.422, 0.236; 4'-PnCH2O-4-Pn, 0.195, 0.236; 2,7-Fln, 1.17, 0.419; 4'-Pn-4,2-Ozn, 1.40, 0.236; 4'-Pn-4,2-Tzn, 1.36, 0.236; 4'-Pn-5,2-Tzn, 1.12, 0.236; 4'-Pn-4-Pn, 0.755, 0.0332; 3'-Pn-4-Pn, 0.662, 0.0332.

**AB3.** L, XGNH2, PA, (g), 25o. G, L: none, 76.0; CH2, 36.5; CH2CH2, 14.6; 3-Pn, 16.0; 4-Pn, 8.47.

**AB4.** L, XGNMe2H+ pKa, aq., 25o. L, G: none, 25.6; CH2, 10.6; CH2CH2, 4.55; 4-Pn, 4.52; 3-Pn, 3.72.

**SA1.** L, XGSO2NH2, pKa, aq., 20‑25o. L, G: none, 6.23; CH2, 2.83; 3-Pn, 1.12; 4-Pn, .977; 5,1-Nn, 0.586; 7,1-Nn, 0.612; 2,8-Nn, 0.500.

**AzB1.** L, XG(=NH+-), pKa, aq., 20‑25o. L, G: 2-Py, 11.3; 2-Py, 9.18; 4-Py, 5.25; 4-Qu, 5.27;

5-Qu, 3.17; 6-iQu, 2.50; 4"-Pn-E-2'-Vn-4-Py, .813; 4'-CC-4-Pn, .451; 7-Qu, 3.63; 6-Qu, 2.90;

4-Qu, 5.58; 1-iQu, 10.1; E-4"-Pn-2'-Vn-4-Py, .949; 2-CH2Py, 5.51; 3-CH2Py, 3.15; 4-CH2Py, 3.19; 2-Qu, 11.1; 3-Py, 6.54; 3-Qu, 4.87; 5',2'-Fn-3-Py, 1.28.

**TA1.** L, XGSH, pKa, aq., 20‑25o. none, 17.3; CH2, 8.99; CH2CH2, 3.77; 4-Pn, 2.10; 3-Pn, 1.99.

**HB1.** L, XGCN, pKHB, CCl4, . none, -2.01; CH2, -0.651; 3-Pn, -0.540; 4-Pn, 0.539; 3-PnCH2, -0.280; 4-PnCH2, -0.329.

**BEH1.** L, XGCO2Et, log k, OH-, aq. EtOH, 24‑30o. G, L: 4,1-bc[2.2.2]-Ocn, 2.19; 4,1-Nn, 2.37; 4'-Pn-4-Pn, 0.607; 5,2-Fn, 2.83; 5,2-Tn, 2.10; 5,2-Bfn, 1.52; 5,2-Idn, 1.08; 4-PnCC, 1.00; 3-Pn, 2.33; 4-PnCH2, 1.14; 4-PnCH2, 1.07; E- 4'-Pn-2-Vn, 1.14; 4-PnCH2CH2, 0.642; none, 12.6; 5,3-Pyn, 2.23; E-4'-Pn-2-cHxn, 0.769; none, 10.5; 4-Pn, 2.31; 4-Pn, 2.33; 3-Pn, 2.39; 3,1-Nn, 2.18; 3-PnCH2CH2, 0.615; 4-PnCH2, 1.04; 3-PnCH2, 1.25; 7,2-Fln, 0.737.

**BEH2.** L, XGCO2Et, log k, OH-, aq., 25o. L, G: none, 10.3; CH2, 4.95; CH2CH2, 1.34; E-2-Vn, 1.91; 3-Pn, 1.34; 4-Pn, 1.45.

**BEH3.** L, XGCO2Et, OH-, log k, aq. MeAc, [φM = 0.280 ± 0.060], 25o. L, G: E-2-Vn, 4.97; 3-Pn, 2.51; 4-Pn, 2.60; 5,2-Tn, 2.62; 3-PnCH2, 0.967; 4-PnCH2, 1.05.

**BEH4.** L, XGCO2Et, OH-, log k, aq. dioxan, 20‑35o. L, G: CH2, 4.28; 5,2-Tn, 2.79; 3-Pn, 1.38; 4-Pn, 2.30; 4-Pn, 2.33; E,E-4"-Pn-2'-Vn-2'-Vn, 0.724.

**BEH5.** L, XGCO2Me, OH-, log k, aq. dioxan, 25o. L, G: E-2-Vn, 4.07; 6,2-Nn, 1.79; 7,2-Nn, 1.46; 4-Pn, 3.00; E-4'-Pn-CO-2-Vn, 0.605; 3-Pn, 2.18; 4-Pn, 2.26.

**BEH6.** L, XGCO2Me, OH-, log k, aq. MeOH, 25o. L, G: 6,2-Nn, 1.28; 4-Pn, 2.07; 3-Pn, 2.21; 4,2-Pyn, 1.93; 5,2-Pyn, 2.12; 6,2-Pyn, 2.39; 6,3-Pyn, 2.48; 6,4-Pyn, 2.12; 5,3-Pyn, 2.29; E-4-cHxn, 1.20; 4'-Pn-2-Pn, 0.559; 1.22.

**CD1.** L, XGCO2H, DDM, log k, EtOH, 25-30o. L, G: CH2, 2.50; 4,1-bc[2.2.2]-Ocn, 0.686; 4-PnCH2, 0.370; E-4,1-cHxn, 0.410; 4'-Pn-E-2-Vn, 0.378; E-2-Vn, 1.81; 5,2-Bfn, 0.599; 5,2-Inn, 0.455; Z-4'-Pn-2-Vn, 0.430; none, 4.74; 3-PnCH2, 0.412; E-3'-Pn-2-Vn, 0.457; 3-Pn, 0.891; 4-Pn, 0.865.

**CF1.** L, XGCHLgMe (Lg = Cl/OpNP), log k, 80 % aq. EtOH, 25o. L, G: 6,2-Btn, 3.96; 6,2-Bfn, 4.41; 4-Pn, 5.82; 5,2-Pyn, 6.05; 5,2-Tn, 7.06; 5,2-Tzn, 6.64; 2,5-Tzn, 6.14; 5,2-Fn, 7.42.

**CF2.** L, XGCHClMe, log k, aq. MeAc, 25-45o, L, G: 3-Pn, 5.29; 3-Pn, 4.92; 3,1-Nn, 4.97; 4,1-Nn, 5.74; 5,1-Nn, 3.25; 6,1-Nn, 2.93; 7,1-Nn, 3.36; 4'-Pn-4-Pn, 2.06; 7,2-Fln, 3.13.

**CF3.** L, XGCMe2Cl, log k, aq. MeAc, 25o. L, G: 3-Pn, 4.84; 4-Pn, 5.02; 4'-Pn-4-Pn, 1.69; 6,2-Nn, 3.52.

**CF4.** L,G,CMe2Cl, log k, 80 % aq. EtOH, 25o. G, L; 6,2-Pyn, 4.07, 3-PnCH2, 1.20, 4-PnCH2, 1.22, CH2CH2, 3.16, none, 10.1,

**PD1.** L, XG, =CT- [detritiation] log k, CF3CO2H [anhydr.],var. T. G, L: 4'-Pn-4-Pn, 2.73; 7,2-Fln, 2.78; 5,1-Nn, 5.12; 4,1-Nn, 9.74x, 4,2-Nn, 5.85; 2,1-Nn, 10.3; 1,2-Nn, 11.7; 3,2-Nn, 6.59.

**SN1.** L, XGCO2-, PhCOCH2Br, log k, aq. MeAc, var. T. G,L; 4,1-Nn, 0.600, 4-Pn, 0.569, 4-Pn, 0.495, 6,2-Nn, 0.276, 3-PnOCH2, 0.211, 4-PnOCH2, 0.213, CH2, 1.22, none, 1.57,

Abbreviations: Vn, vinylene; Pn, phenylene, Nn, naphthylene, Azn, Azulylene, Fln, fluorenylene; cPrn, cyclopropylene; cBun, cyclobutylene, cPen, cyclopentylene, cHxn, cyclohexylene; s[3.3]Hpn, spiro[3.3]heptylene; bc[2.2.1]Hpn, bicyclo[2.2.1]heptylene; bc[2.2.2]Oen, bicyclo[2.2.2]octrnylene; bc[2.2.2]Ocn, bicyclo[2.2.2]octylene; Adn, adamantylene; Cbn, cubanylene, Fn, furylene; Tn, Thiophenylene; Spn, selenophenylene; Tpn, tellurophenylene; Prn, pyrrolene,Pyn, pyridylene, Ozn, oxazolylene; Tzn, thiazolylene; Bfn, benzofurylene, Btn, benzothiophenylene; Pnn, pyrenylene; Idn, indolylene; Py, pyridyl, Qu, quinolyl; iQu, isoquinolyl The absence of a skeletal group is indicated by "none".

**Table 2.** Results of correlations with eqs 5a and 5b.

| Set | Y | Solv. | _ | sC | ao | sao | 100r2 | F | Sest | So | N |
| --- | --- | --- | --- | --- | --- | --- | --- | --- | --- | --- | --- |
| CA1 | CO2H | W | 39.5 | 0.843 | ‑0.319 | 0.0704 | 98.52 | 2195 | 0.24 | 0.125 | 35 |
|  |  |  | *20.9* | *0.835* | *‑2.64* | *0.198* | *94.51* | *568.9* | *0.46* | *0.241* | *35* |
| CA2 | CO2H | AEa | 40.6 | 1.83 | 0.114n | 0.0767 | 95.36 | 493.5 | 0.24 | 0.224 | 26 |
|  |  | AE | 46.7 | 1.22 | ‑0.123n | 0.107 | 96.91 | 1472 | 0.33 | 0.18 | 49 |
|  |  |  | *24.1* | *1.27* | *‑2.7* | *0.243* | *88.53* | *362.6* | *0.63* | *0.346* | *49* |
| CA3 | CO2H | AMCS | 46.4 | 1.45 | 0.0063n | 0.114 | 98.84 | 1019 | 0.34 | 0.117 | 14 |
|  |  |  | *25.8* | *1.96* | *‑2.61* | *0.427* | *93.5* | *172.7* | *0.8* | *0.275* | *14* |
| CA4 | CO2H | AMb | 29.3 | 1.74 | 0.346n | 0.186 | 98.27 | 284.2 | 0.35 | 0.156 | 7 |
|  |  | AM | 30.3 | 1.28 | 0.208n | 0.114 | 98.28 | 562.8 | 0.29 | 0.145 | 12 |
|  |  |  | *17.6* | *0.985* | *‑1.79* | *0.241* | *96.96* | *318.9* | *0.39* | *0.191* | *12* |
| CA5 | CO2H | M | 35.7 | 2.07 | ‑0.018n | 0.2 | 97.69 | 296.4 | 0.44 | 0.172 | 9 |
|  |  |  | *21.7* | *2.57* | *‑2.66* | *0.64* | *91.44* | *74.77* | *0.85* | *0.332* | *9* |
| CA6 | CO2H | E | 46 | 4.64 | ‑0.144n | 0.644 | 98 | 98.14 | 0.82 | 0.2 | 4 |
|  |  |  | *30.1* | *5.89* | *‑4.26* | *1.93* | *92.91* | *26.21* | *1.54* | *0.377* | *4* |
| CA7 | CO2H | DMSO | 69 | 7.86 | ‑0.149n | 1.09 | 97.47 | 76.95 | 1.39 | 0.225 | 4 |
|  |  |  | *45.1* | *9.44* | *‑6.3* | *3.09* | *91.96* | *22.87* | *2.48* | *0.401* | *4* |
| CA8 | CO2H | AD | 41.8 | 2.11 | ‑0.078n | 0.117 | 95.61 | 392 | 0.33 | 0.221 | 20 |
| Set | Y | Solv. | _ | sC | ao | sao | 100r2 | F | Sest | So | N |
|  |  |  | *19.6* | *1.15* | *‑2.08* | *0.238* | *94.16* | *290* | *0.38* | *0.255* | *20* |
| CA9 | CO2H | ABCS | 43.1 | 6.86 | 0.0144n | 0.187 | 90.8 | 39.48 | 0.21 | 0.371 | 6 |
|  |  |  | *13.3* | *1.93* | *‑0.935* | *0.301* | *92.19* | *47.25* | *0.19* | *0.342* | *6* |
| CA10 | CO2H | g | 150 | 7.76 | 9.15 | 0.888 | 98.95 | 375.3 | 1.54 | 0.126 | 6 |
|  |  |  | 153 | 16.1 | 7.93 | 1.75 | 94.75 | 90.27 | 1.22 | 0.271 | 7 |
|  |  |  | *98* | *14.6* | *‑5.1n* | *4.08* | *90.03* | *45.15* | *4.43* | *0.374* | *7* |
| CA11 | CO2H | DMF | 56 | 4.81 | 0.319n | 0.249 | 91.13 | 135.4 | 0.38 | 0.207 | 6 |
|  |  |  | *3.71* | *0.685* | *‑0.382* | *0.138* | *88.03* | *29.43* | *0.12* | *0.424* | *6* |
| CA12 | CO2H | AN | 48.9 | 2.15 | 0.384n | 0.268 | 99.42 | 515.3 | 0.42 | 0.098 | 5 |
|  |  |  | *31.4* | *2.8* | *‑3.67* | *0.838* | *97.68* | *126.3* | *0.83* | *0.197* | *5* |
| HA1 | OH | AE | 49.6 | 9.37 | 0.64n | 0.367 | 63.67 | 28.04 | 0.82 | 0.639 | 18 |
|  |  |  | *18.6* | *3.15* | *‑0.633n* | *0.529* | *68.45* | *34.71* | *0.76* | *0.596* | *18* |
| HA2 | OH | W | 15.1 | 1.04 | 1.76 | 0.331 | 95.87 | 208.7 | 0.94 | 0.225 | 11 |
|  |  |  | *18.0* | *0.888* | *‑1.74* | *0.359* | *97.85* | *409.5* | *0.68* | *0.162* | *11* |
| HA3 | OH | g | 34.3 | 12.3 | 27.6 | 5.35 | 66.18 | 7.828 | 9.92 | 0.712 | 6 |
|  |  |  | 38.7 | 10 | 23.7 | 4.77 | 83.18 | 14.84 | 7.88 | 0.529 | 5 |
|  |  |  | *45.3* | *13.2* | *16.4* | *7.07* | *74.56* | *11.72* | *8.6* | *0.618* | *6* |
| HA4 | CZ=NOH | W | 47.1 | 3.63 | ‑0.102n | 0.272 | 97.12 | 168.5 | 0.43 | 0.201 | 7 |
|  |  |  | *21.7* | *1.99* | *‑2.15* | *0.489* | *95.94* | *118.2* | *0.51* | *0.238* | *7* |
| *Set* | *Y* | *Solv.* | *_* | *sC* | *ao* | *sao* | *100r2* | *F* | *Sest* | *So* | *N* |
| PA1 | HOPO2- | W | 6.39 | 0.863 | 1.39 | 0.445 | 96.48 | 54.89 | 0.69 | 0.265 | 4 |
|  |  |  | *7.73* | *0.078* | *‑0.11* | *0.0446* | *99.98* | *9899* | *0.05* | *0.02* | *4* |
| AB1 | NH3+ | W | 23.7 | 1.19 | 1.66 | 0.334 | 97.07 | 397.8 | 1.09 | 0.185 | 14 |
|  |  |  | *27.2* | *1.45* | *‑3.29* | *0.535* | *96.7* | *351.4* | *1.16* | *0.196* | *14* |
| AB2 | NH3+ | AEc | 28 | 1.61 | 1.09n | 0.657 | 98.7 | 303.2 | 1.43 | 0.14 | 6 |
|  |  | AE | 28.1 | 1.27 | 0.96 | 0.369 | 97.99 | 487.9 | 1.2 | 0.155 | 12 |
|  |  |  | *31.5* | *0.566* | *‑2.65* | *0.18* | *99.68* | *3111* | *0.48* | *0.062* | *12* |
| AB3 | NH2 | g | 67.5 | 8.01 | 10.3 | 3.72 | 95.95 | 71 | 6.47 | 0.26 | 5 |
|  |  |  | *85.2* | *5.59* | *‑8.85* | *3.03* | *98.72* | *232.3* | *3.63* | *0.146* | *5* |
| AB4 | NMe2H+ | W | 22.7 | 1.66 | 3.14 | 0.772 | 98.42 | 187.4 | 1.34 | 0.162 | 5 |
|  |  |  | *28.2* | *2.42* | *‑3.09* | *1.31* | *97.84* | *135.7* | *1.57* | *0.19* | *5* |
| SA1 | SO2NH2 | W | 25 | 0.855 | 0.0083n | 0.0912 | 99.42 | 853.1 | 0.18 | 0.09 | 7 |
|  |  |  | *16.2* | *0.919* | *‑2.1* | *0.249* | *98.41* | *310.1* | *0.29* | *0.149* | *7* |
| AzB1 | =NH+- | W | 37.9 | 2.39 | 1.2 | 0.304 | 93.3 | 250.8 | 0.89 | 0.273 | 20 |
|  |  |  | *24.2* | *1.36* | *‑1.97* | *0.421* | *94.64* | *318* | *0.8* | *0.244* | *20* |
| TA1 | SH | W | 15.6 | 2.32 | 2.26 | 1.08 | 93.78 | 45.25 | 1.87 | 0.322 | 5 |
|  |  |  | *19.9* | *1.5* | *‑2.25* | *0.81* | *98.33* | *176.5* | *0.97* | *0.167* | *5* |
| HB1 | CN | CCl4 | 6.92 | 0.936 | 0.175n | 0.107 | 93.19 | 54.70 | 0.188 | 0.320 | 6 |
|  |  |  | *4.32* | *0.836* | *-0.361n* | *0.236* | *86.93* | *26.61* | *0.261* | *0.443* | *6* |
| Set | Y | Solv. | _ | sC | ao | sao | 100r2 | F | Sest | So | N |
| BEH1 | CO2Et | AEd | 11.6 | 0.687 | 1.13 | 0.179 | 95.62 | 283.6 | 0.64 | 0.225 | 15 |
|  |  |  | *13.6* | *0.545* | *-0.96* | *0.172* | *97.96* | *623.9* | *0.438* | *0.153* | *15* |
|  |  | AE | 10.5 | 0.495 | 1.16n | 1.141 | 95.11 | 447.4 | 0.648 | 0.231 | 25 |
|  |  |  | *12.4* | *0.422* | *-0.771* | *0.143* | *97.39* | *859.9* | *0.473* | *0.168* | *25* |
| BEH2 | CO2Et | W | 9.5 | 1.07 | 1.06 | 0.456 | 95.18 | 79.01 | 0.88 | 0.269 | 6 |
|  |  |  | *12.0* | *1.09* | *-1.68* | *0.557* | *96.82* | *121.8* | *0.716* | *0.218* | *6* |
| BEH3 | CO2Et | AA | 5.32 | 1.5 | 2.12 | 0.573 | 71.63 | 12.63 | 1.31 | 0.63 | 7 |
|  |  |  | 45.6 | 8.94 | ‑0.159n | 0.566 | 86.68 | 26.03 | 0.59 | 0.447 | 6 |
|  |  |  | *6.80* | *1.54* | *0.805n* | *0.674* | *79.63* | *19.55* | *1.11* | *0.534* | *7* |
|  |  |  | *22.9* | *4.79* | *-2.90* | *1.15* | *85.13* | *22.90* | *0.627* | *0.472* | *6* |
| BEH4 | CO2Et | AD | 11.7 | 3.57 | 1.54 | 0.422 | 78.17 | 10.74 | 0.69 | 0.603 | 5 |
|  |  |  | *8.19* | *1.59* | *0.42n* | *0.452* | *89.84* | *26.52* | *0.47* | *0.412* | *5* |
| BEH5 | CO2Me | AD | 30.9 | 9.23 | 0.86n | 0.511 | 78.83 | 11.17 | 0.72 | 0.594 | 5 |
|  |  |  | *14.8* | *3.33* | *-0.62n* | *0.678* | *86.88* | *19.87* | *0.569* | *0.468* | *5* |
| BEH6 | CO2Me | AM | 13.8 | 6.79 | 1.43 | 0.356 | 35.47 | 3.848 | 0.3 | 0.911 | 9 |
|  |  |  | 16.6 | 5.3 | 1.19 | 0.285 | 62.05 | 9.812 | 0.23 | 0.711 | 8 |
|  |  |  | *5.94* | *2.65* | *0.784n* | *0.594* | *41.8* | *5.028* | *0.28* | *0.865* | *9* |
|  |  |  | *7.04* | *2* | *0.472n* | *0.454* | *67.45* | *12.43* | *0.21* | *0.659* | *8* |
| CD1 | CO2H | E | 19.1 | 0.925 | 0.132n | 0.0723 | 97.27 | 427.7 | 0.21 | 0.178 | 14 |
| Set | Y | Solv. | _ | sC | ao | sao | 100r2 | F | Sest | So | N |
|  |  |  | *11.7* | *0.494* | *‑1.25* | *0.11* | *97.91* | *563.3* | *0.18* | *0.156* | *14* |
| CF1 | CHLgMe | AE | 68.2 | 13.5 | 2.65 | 0.683 | 80.91 | 25.43 | 0.57 | 0.505 | 8 |
|  |  |  | *29.3* | *5.38* | *‑0.416n* | *1.18* | *83.16* | *29.63* | *0.54* | *0.474* | *8* |
| CF2 | CHClMe | AA | 55.4 | 15.1 | 1.7 | 0.672 | 65.8 | 13.47 | 0.8 | 0.663 | 9 |
|  |  |  | *21.1* | *5.6* | *‑0.196n* | *1.13* | *66.98* | *14.2* | *0.79* | *0.652* | *9* |
| CF3 | CMe2Cl | AA | 57.9 | 26.5 | 1.81n | 1.03 | 70.49 | 4.778 | 1.02 | 0.768 | 4 |
|  |  |  | *22.2* | *8.07* | *‑0.144n* | *1.48* | *79.13* | *7.582* | *0.86* | *0.646* | *4* |
| CF4 | CMe2Cl | AE | 8.28 | 1.49 | 1.89 | 0.673 | 91.13 | 30.81 | 1.26 | 0.385 | 5 |
|  |  |  | *10.2* | *1.52* | *‑0.034n* | *0.755* | *93.81* | *45.44* | *1.05* | *0.321* | *5* |
| PD1 | =CT- | TFA | 28.3 | 6.49 | 2.54 | 1.11 | 79.1 | 18.93 | 1.73 | 0.541 | 7 |
|  |  |  | *18.9* | *4.26* | *0.0426n* | *1.58* | *79.69* | *19.62* | *1.71* | *0.533* | *7* |
| NS1 | CO2- | AA | 5.64 | *0.591* | *0.295* | *0.088* | *86.97* | *40.04* | *0.19* | *0.417* | *8* |
|  |  |  | *3.63* | *0.373* | *‑0.139n* | *0.0929* | *94.04* | *94.63* | *0.13* | *0.282* | *8* |

Lg, leaving group. Values in italics are for correlations with equation 11, other values are for correlations with equation 9. Abbreviations: W, water; AE, aq. ethanol; AMCS, aq. methylcellosolve; AM, aq. methanol; M, methanol; E, ethanol; DMSO, dimethylsulfoxide; ABCS, aq. butylcellosolve; AA, aq. acetone; AD, aq. dioxane; TFA, trifluoroacetic acid; g, gas phase, DMSO?, dimethyl sulfoxide; DMF, dimethylformamide; AN, acetonitrile; Compositions of aqueous organic solvents are variable unless otherwise noted. n, not significant. Aqueous organic solvents are of varying composition unless otherwise noted. a. 22-29 mole % AE. b. 30.9 mole % AM. c. 23.6 mole % AE. d. 68.9-69.6 mole % AE.

Statistics: 100r2, 100R2, per cent of the data accounted for by the regression equation; A100R2, per cent of the data accounted for by the regression equation adjusted for the number of independent variables, F, a test for the significance of the regression coefficients and a measure of the goodness of fit; Sa, Sao, standard errors of the regression coefficients; Sest, standard error of the estimate; So, standard error of the estimate divided by the root mean square of the data.

**Table 3.** Results of correlations with equation 7.

| Set | Y | Solv. | m | sm | bo | Sbo | 100r2 | F | Sest | So | N |
| --- | --- | --- | --- | --- | --- | --- | --- | --- | --- | --- | --- |
| CA1 | CO2H | W | ‑2.75 | 0.141 | 1.96 | 0.103 | 92.08 | 383.4 | 0.139 | 0.290 | 35 |
| CA2 | CO2H | AE | ‑2.06 | 0.136 | 1.69 | 0.106 | 90.52 | 229.3 | 0.0876 | 0.32 | 26 |
|  |  |  | ‑2.15 | 0.129 | 1.72 | 0.101 | 85.4 | 280.7 | 0.129 | 0.39 | 50 |
| CA3 | CO2H | AMCS | ‑2.17 | 0.178 | 1.79 | 0.144 | 92.59 | 149.9 | 0.143 | 0.294 | 14 |
| CA4 | CO2H | AM | ‑1.85 | 0.196 | 1.45 | 0.131 | 94.7 | 89.27 | 0.0888 | 0.272 | 7 |
|  |  |  | ‑2.1 | 0.149 | 1.6 | 0.112 | 95.17 | 197.2 | 0.112 | 0.241 | 12 |
| CA5 | CO2H | M | ‑1.79 | 0.333 | 1.42 | 0.209 | 87.9 | 29.07 | 0.14 | 0.426 | 6 |
| CA6 | CO2H | E | ‑1.79 | 0.264 | 1.54 | 0.157 | 95.81 | 45.78 | 0.0992 | 0.289 | 4 |
| CA7 | CO2H | DMSO | ‑1.73 | 0.289 | 1.7 | 0.172 | 94.73 | 35.94 | 0.109 | 0.325 | 4 |
| CA8 | CO2H | AD | ‑2.17 | 0.22 | 1.7 | 0.166 | 84.41 | 97.48 | 0.146 | 0.416 | 20 |
| CA9 | CO2H | ABCS | ‑2.05 | 0.352 | 1.68 | 0.298 | 89.48 | 33.96 | 0.103 | 0.98 | 6 |
| CA10 | CO2H | g | ‑1.1 | 0.131 | 1.97 | 0.0867 | 94.64 | 70.67 | 0.0589 | 0.283 | 6 |
|  |  |  | -1.07 | 0.255 | 1.91 | 0.167 | 77.77 | 17.49 | 0.115 | 0.558 | 7 |
| CA11 | CO2H | DMF | -1.91 | 0.271 | 1.75 | 0.206 | 92.57 | 49.81 | 0.0904 | 0.334 | 6 |
| CA12 | CO2H | AN | -1.83 | 0.344 | 1.61 | 0.218 | 90.41 | 28.27 | 0.153 | 0.400 | 5 |
| HA1 | OH | AE | ‑2.98 | 0.252 | 2.66 | 0.221 | 97.91 | 140.7 | 0.0862 | 0.187 | 5 |
|  |  |  | ‑1.83 | 0.228 | 1.7 | 0.187 | 80.01 | 64.06 | 0.174 | 0.474 | 18 |
| Set | Y | Solv. | m | sm | bo | Sbo | 100r2 | F | Sest | So | N |
| HA2 | OH | W | ‑1.4 | 0.171 | 1.25 | 0.101 | 88.05 | 66.31 | 0.125 | 0.382 | 11 |
| HA3 | OH | g | ‑0.652 | 0.194 | 1.8 | 0.0889 | 73.88 | 11.32 | 0.109 | 0.626 | 6 |
|  |  |  | ‑0.703 | 0.135 | 1.79 | 0.0611 | 90.09 | 27.26 | 0.0747 | 0.406 | 5 |
| HA4 | MZ=NOH | W | ‑2.08 | 0.109 | 1.69 | 0.0785 | 98.63 | 361 | 0.0573 | 0.138 | 7 |
| PA1 | HOPO2- | W | ‑1.05 | 0.0151 | 0.887 | 0.0082 | 99.96 | 4852 | 0.0095 | 0.0287 | 4 |
| AB1 | NH3+ | W | ‑1.7 | 0.261 | 1.49 | 0.164 | 77.92 | 42.34 | 0.209 | 0.508 | 14 |
| AB2 | NH3+ | AE | ‑1.98 | 0.307 | 1.64 | 0.251 | 91.21 | 41.51 | 0.277 | 0.363 | 6 |
|  |  |  | ‑1.89 | 0.225 | 1.68 | 0.196 | 87.66 | 71.05 | 0.217 | 0.385 | 12 |
| AB3 | NH2 | g | ‑1.36 | 0.166 | 1.9 | 0.0801 | 95.73 | 67.27 | 0.0914 | 0.267 | 5 |
| AB4 | NMe2H+ | W | ‑1.22 | 0.215 | 1.37 | 0.104 | 91.48 | 32.21 | 0.119 | 0.377 | 5 |
| SA1 | SO2NH2 | W | ‑2.06 | 0.217 | 1.43 | 0.148 | 94.75 | 90.22 | 0.102 | 0.271 | 7 |
| AZB1 | =NH+- | W | ‑1.65 | 0.108 | 1.55 | 0.0694 | 92.85 | 233.8 | 0.108 | 0.282 | 20 |
| TA1 | SH | W | ‑1.45 | 0.178 | 1.28 | 0.0859 | 95.69 | 66.65 | 0.0594 | 0.268 | 5 |
| HB1 | CN | CCl4 | -1.30 | 0.297 | 0.595 | 0.200 | 82.65 | 19.05 | 0.141 | 0.510 | 6 |
| BEH1 | CO2Et | AE | ‑1.46 | 0.199 | 1.21 | 0.144 | 80.51 | 53.71 | 0.161 | 0.474 | 15 |
|  |  |  | ‑1.37 | 0.11 | 1.14 | 0.0782 | 87.17 | 156.3 | 0.122 | 0.373 | 25 |
| BEH2 | CO2Et | W | ‑1.4 | 0.253 | 0.997 | 0.122 | 88.46 | 30.66 | 0.14 | 0.416 | 6 |
| BEH3 | CO2Et | AA | ‑1.02 | 0.301 | 0.964 | 0.181 | 69.88 | 11.6 | 0.193 | 0.649 | 7 |
|  |  |  | ‑2.23 | 0.646 | 1.76 | 0.42 | 74.85 | 11.91 | 0.152 | 0.614 | 6 |
| Set | Y | Solv. | m | sm | bo | Sbo | 100r2 | F | Sest | So | N |
| BEH4 | CO2Et | AD | ‑1.13 | 0.259 | 1.07 | 0.177 | 86.41 | 19.07 | 0.122 | 0.476 | 5 |
| BEH5 | CO2Et | AD | ‑1.67 | 0.559 | 1.49 | 0.422 | 74.81 | 8.911 | 0.185 | 0.648 | 5 |
|  |  |  | ‑1.55 | 0.431 | 1.39 | 0.313 | 72.13 | 12.94 | 0.153 | 0.625 | 7 |
| BEH6 | CO2Et | AM | ‑0.752 | 0.259 | 0.813 | 0.172 | 54.65 | 8.436 | 0.061 | 0.764 | 9 |
|  |  |  | ‑0.836 | 0.198 | 0.855 | 0.131 | 74.79 | 17.81 | 0.046 | 0.58 | 8 |
|  |  |  | ‑1.67 | 0.407 | 1.35 | 0.28 | 65.23 | 16.88 | 0.12 | 0.652 | 11 |
| CD1 | CO2H | E | ‑1.91 | 0.17 | 1.29 | 0.126 | 94.06 | 126.7 | 0.101 | 0.272 | 10 |
| CF1 | CHLgMe | AE | ‑1.12 | 0.193 | 1.52 | 0.13 | 85.01 | 34.05 | 0.0402 | 0.447 | 8 |
| CF2 | CHClMe | AA | ‑1.06 | 0.233 | 1.34 | 0.17 | 74.99 | 20.99 | 0.0795 | 0.567 | 9 |
| CF3 | CMe2Cl | AA | ‑1.28 | 0.423 | 1.53 | 0.333 | 81.96 | 9.089 | 0.114 | 0.601 | 4 |
| CF4 | CMe2Cl | AE | -1.16 | 0.294 | 1.05 | 0.171 | 83.81 | 15.52 | 0.181 | 0.520 | 5 |
| PD1 | =CT- | TFA | ‑0.945 | 0.153 | 1.25 | 0.0871 | 88.48 | 38.4 | 0.0922 | 0.402 | 7 |
| NS1 | CO2- | AA | -1.40 | 0.180 | 0.705 | 0.180 | 84.86 | 33.62 | 0.138 | 0.449 | 8 |

For footnotes see Table 2.

**Table 4.** Results of correlations with equations 8a and 8b.

| Set | Y | Solvent | C | SC | _ | S_ | ao |
| --- | --- | --- | --- | --- | --- | --- | --- |
| CA2 | CO2H | AE | 46 | 1.26 | 0.647 | 0.342 | ‑0.286 |
|  |  |  | *17.8* | *1.03* | *0.798* | *0.42* | *‑1.92* |
| CA4 | CO2H | AM | 30 | 1.35 | ‑0.356 | 0.385 | 0.355 |
|  |  |  | *19* | *0.653* | *1.43* | *0.319* | *‑2.59* |
| CA8 | CO2H | AD | 41.5 | 1.97 | 1.03 | 0.531 | ‑0.297 |
|  |  |  | *19.5* | *1.17* | *0.531* | *0.667* | *‑2.17* |
| HA1 | OH | AE | 49.9 | 11.3 | 0.0564 | 1.05 | 0.647 |
|  |  |  | *21* | *3.96* | *‑1.03* | *1.01* | *‑0.642* |
| AB2 | NH3+ | AE | 28.1 | 1.27 | 3.65 | 3.46 | 0.144 |
|  |  |  | *31.5* | *0.573* | *1.27* | *1.41* | *‑2.93* |
| Set | Sao | 100R2 | A100R2 | F | Sest | So | N |
| CA2 | 0.107 | 97.13 | 97.07 | 778.1 | 0.321 | 0.175 | 49 |
|  | *0.212* | *87.04* | *86.77* | *154.5* | *0.394* | *0.372* | *49* |
| CA4 | 0.196 | 98.41 | 98.25 | 277.8 | 0.294 | 0.146 | 12 |
|  | *0.227* | *99.06* | *98.97* | *473.8* | *0.226* | *0.112* | *12* |
| CA8 | 0.156 | 96.41 | 96.21 | 228.2 | 0.307 | 0.206 | 20 |
| Set | Y | Solvent | C | SC | f | Sf | ao |
|  | *0.271* | *94.36* | *94.05* | *142.4* | *0.385* | *0.257* | *20* |
| HA1 | 0.444 | 64.49 | 62.13 | 12.71 | 0.863 | 0.657 | 17 |
|  | *0.528* | *70.47* | *68.63* | *17.90* | *0.761* | *0.595* | *18* |
| AB2 | 0.855 | 98.21 | 98.03 | 247.3 | 1.19 | 0.154 | 12 |
|  | *0.357* | *99.71* | *99.68* | *1527* | *0.483* | *0.0626* | *12* |

For abbreviations see Table 1.

**Table 5.** Values of log _2, log _1, bo, rtc, and m.

| Set | log _2 | log _1 | bo | rtc | -m |
| --- | --- | --- | --- | --- | --- |
| CA1 | 1.60 | 1.35 | 1.96 | 0.590 | U |
| CA2 | 1.67 | 1.38 | 1.72 | 0.118 | 2 |
| CA3 | 1.67 | 1.41 | 1.79 | 0.316 | U |
| CA4 | 1.48 | 1.25 | 1.60 | 0.343 | U |
| CA5 | 1.55 | 1.34 | 1.42 | 1.63 | U |
| CA6 | 1.66 | 1.48 | 1.54 | 2 | U |
| CA7 | 1.84 | 1.65 | 1.70 | 2.8 | U |
| CA8 | 1.62 | 1.29 | 1.70 | 0.195 | 2 |
| CA9 | 1.63 | 1.12 | 1.68 | 0.0893 | 2 |
| CA10 | 2.18 | 1.99 | 1.97 | 3.5 | U |
| CA11 | 1.75 | 0.569 | 1.75 | 0.0111 | 2 |
| CA12 | 1.69 | 1.50 | 1.61 | 0.727 | U |
| HA1 | 1.70 | 1.27 | 1.70 | 0.116 | 2 |
| HA2 | 1.18 | 1.26 | 1.25 | 7 | 1 |
| HA3 | 1.54 | 1.66 | 1.80 | 1.86 | U |
| HA4 | 1.67 | 1.34 | 1.69 | 0.0571 | 2 |
| PA1 | 0.806 | 0.888 | 0.887 | 51 | 1 |
| AB1 | 1.38 | 1.44 | 1.49 | 2.2 | U |
| AB2 | 1.45 | 1.50 | 1.68 | 1.28 | U |
| AB3 | 1.83 | 1.93 | 1.90 | 2.33 | U |
| AB4 | 1.36 | 1.45 | 1.37 | 0.125 | 2 |
| SA1 | 1.40 | 1.21 | 1.43 | 0.143 | 2 |
| AzB1 | 1.58 | 1.39 | 1.55 | 0.188 | 2 |
|  |  |  |  |  |  |
| Set | log _2 | log _1 | bo | rtc | -m |
| TA1 | 1.19 | 1.30 | 1.28 | 4.5 | U |
| HB1 | 0.840 | 0.635 | 0.595 | 6.13 | 1 |
| BEH1 | 1.02 | 1.09 | 1.14 | 2.4 | U |
| BEH2 | 0.978 | 1.08 | 0.997 | 0.232 | U |
| BEH3 | 1.66 | 1.37 | 1.76 | 0.256 | U |
| BEH4 | 1.07 | 0.913 | 1.07 | 0.6 | U |
| BEH5 | 1.49 | 1.17 | 1.49 | <0.001 | 2 |
| BEH6 | 1.22 | 0.848 | 0.855 | 51.4 | 1 |
| CD1 | 1.28 | 1.07 | 1.29 | 0.0455 | 2 |
| CF1 | 1.83 | 1.47 | 1.52 | 6.20 | 1 |
| CF2 | 1.74 | 1.32 | 1.34 | 10.0 | 1 |
| CF3 | 1.76 | 1.35 | 1.53 | 1.28 | U |
| CF4 | 0.918 | 1.01 | 1.05 | 3.33 | U |
| CF11 | 1.79 | 1.38 | 1.32 | 7.83 | 1 |
| CF12 | 0.924 | 1.02 | 1.06 | 3.50 | U |
| PD1 | 1.45 | 1.28 | 1.25 | 7.83 | 1 |
| NS1 | 0.751 | 0.560 | 0.705 | 3.50 | U |

**Table 6.** Results of correlations with eqs 17a, 17b, and 18.

| Set | _/m | Sa/Sm | s | Ss | ao/bo | Sao/Sbo | 100R2 | A100R2 | F | Sest | So | N |
| --- | --- | --- | --- | --- | --- | --- | --- | --- | --- | --- | --- | --- |
| CF11 | 59.8 | 16.5 | 1.17 | 0.546 | 1.88 | 0.763 | 59.81 | 57.29 | 11.16 | 1.12 | 0.695 | 18 |
|  | 60.9 | 6.88 | 1.77 | 0.238 | 1.24 | 0.327 | 92.80 | 92.28 | 83.76 | 0.467 | 0.298 | 16 |
|  | *24.3* | *6.35* | *1.14* | *0.533* | *-0.458* | *1.30* | *61.88* | *59.49* | *12.17* | *1.09* | *0.676* | 18 |
|  | *23.7* | *2.90* | *1.72* | *0.256* | *-0.917* | *0.596* | *91.77* | *91.19* | *72.52* | *0.499* | *0.318* | *16* |
|  | **-1.12** | **0.228** | **0.105** | **0.0447** | **1.41** | **0.166** | **71.33** | **69.54** | **18.66** | **0.0914** | **0.587** | **18** |
|  | **-1.06** | **0.110** | **0.156** | **0.0227** | **1.32** | **0.0808** | **93.47** | **93.01** | **93.08** | **0.0439** | **0.283** | **16** |
| CF12 | 8.39 | 1.57 | 1.62 | 0.949 | 1.87 | 0.708 | 82.68 | 80.21 | 14.32 | 1.32 | 0.510 | 9 |
|  | *10.5* | *1.47* | *2.06* | *0.760* | *-0.143* | *0.736* | *89.46* | *87.96* | *25.47* | *1.03* | *0.398* | *9* |
|  | **-1.18** | **0.215** | **0.395** | **0.112** | **1.06** | **0.127** | **83.68** | **81.35** | **15.39** | **0.144** | **0.495** | **9** |

Results in ordinary type are for correlations with eq 17a, those in italics are for correlations with eq 17b, those in boldface are for correlations with eq 18.

**Table 7.** m as a function of assigned Δq.

| m |  | No. of sets |  |  |
| --- | --- | --- | --- | --- |
|  | Δq = S | M | M-L | L |
| - 2 | 1 | 10 | 0 | 0 |
| *- 2* | 0 | 4 | 1 | 0 |
| U | 0 | 1 | 0 | 2 |
| *- 1* | 0 | 0 | 7 | 1 |
| - 1 | 0 | 0 | 4 | 5 |


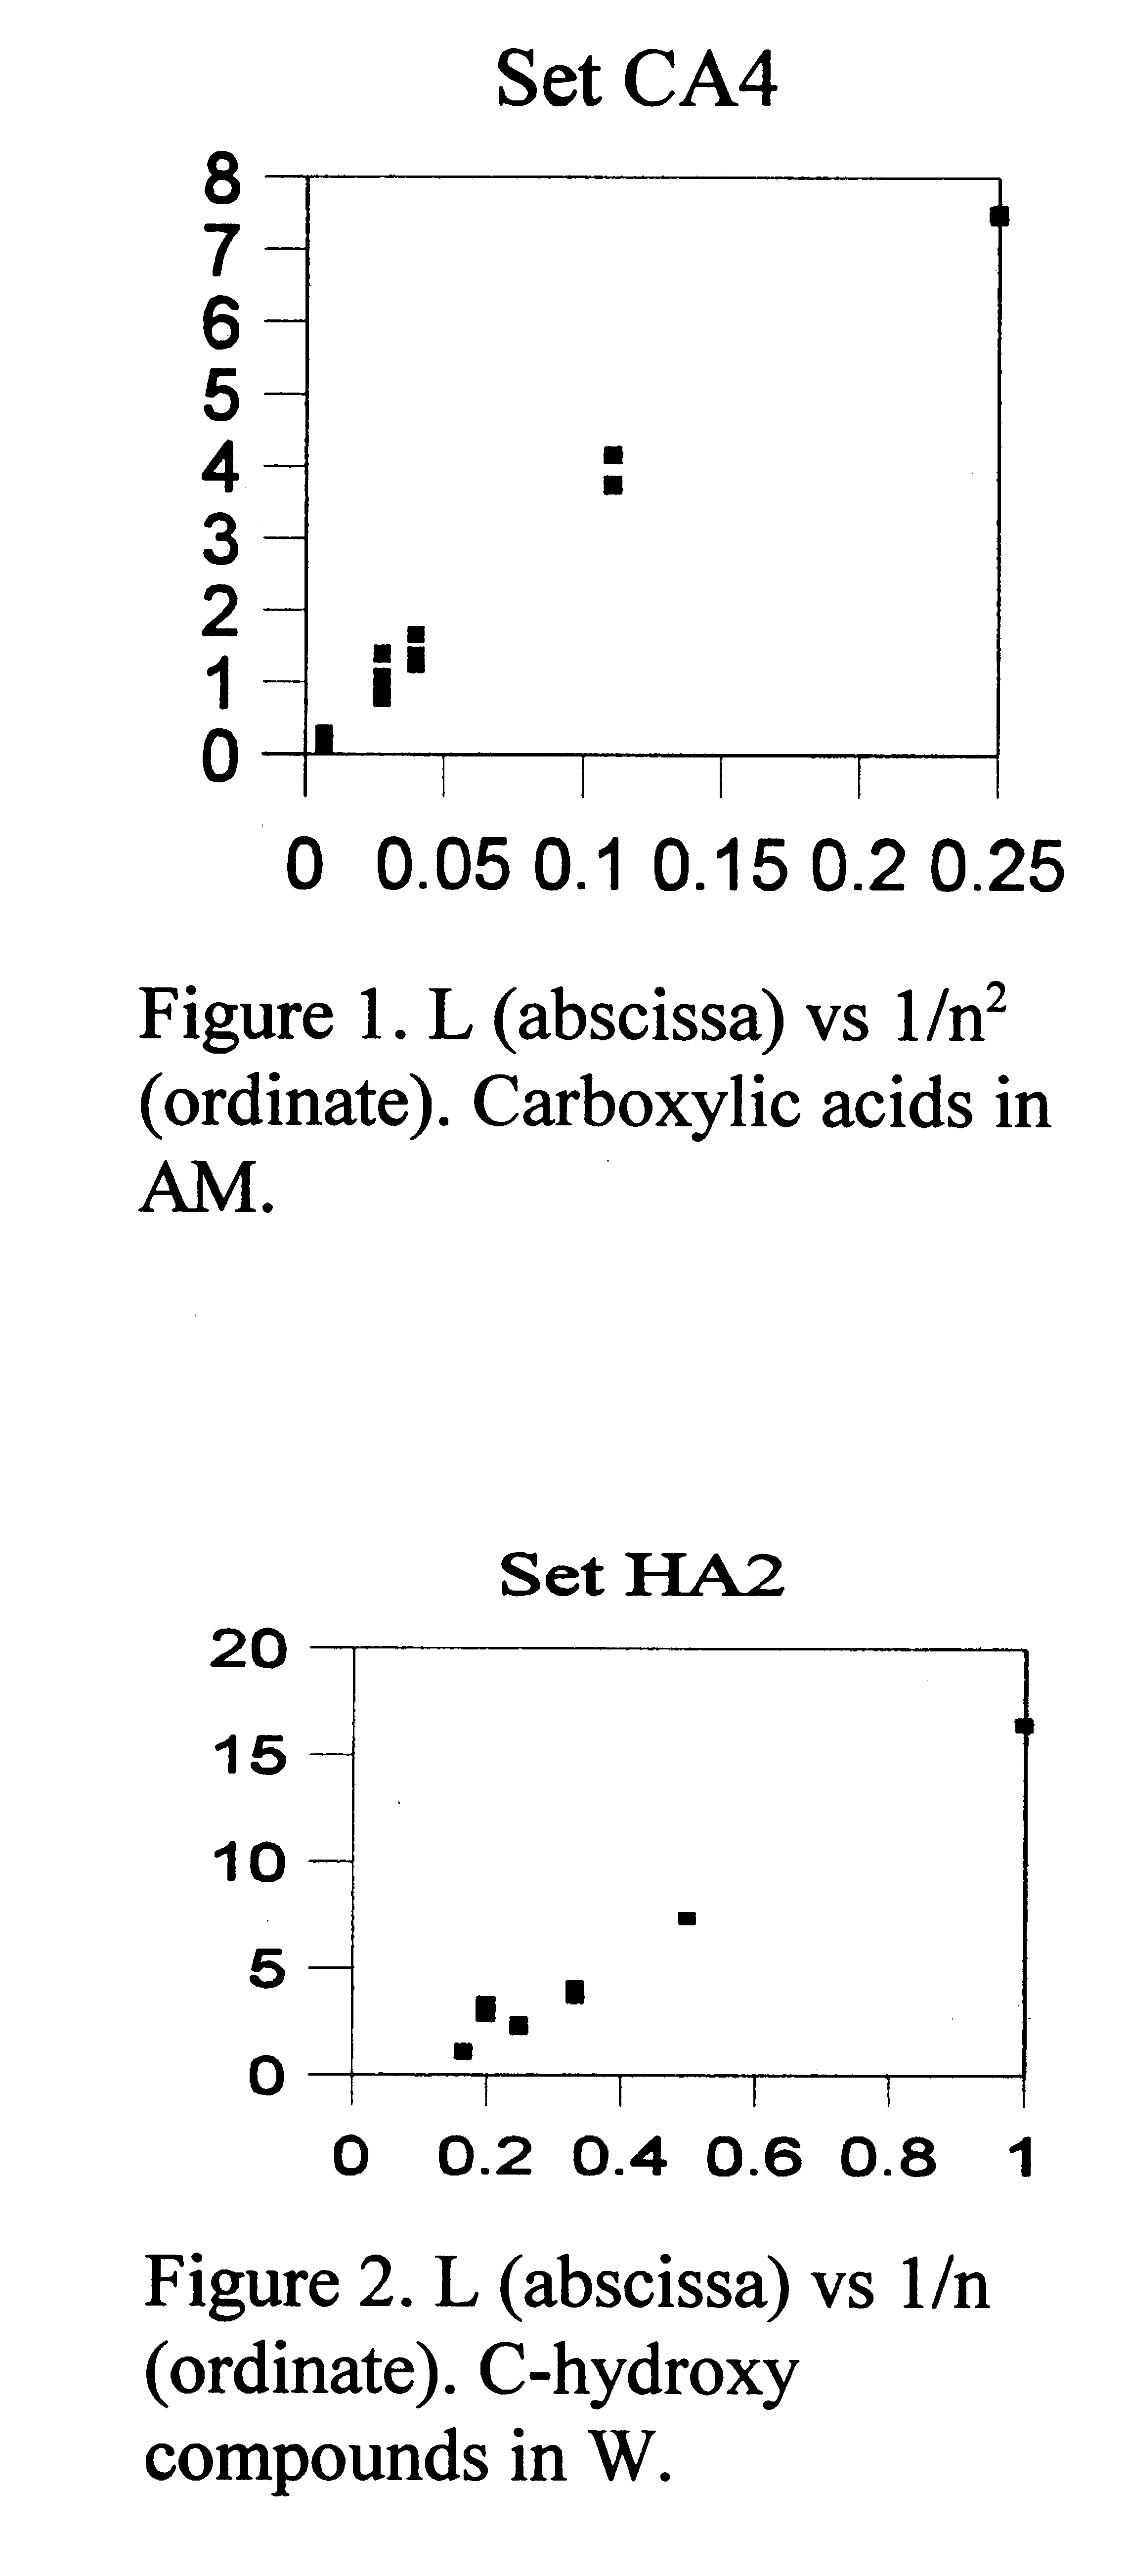


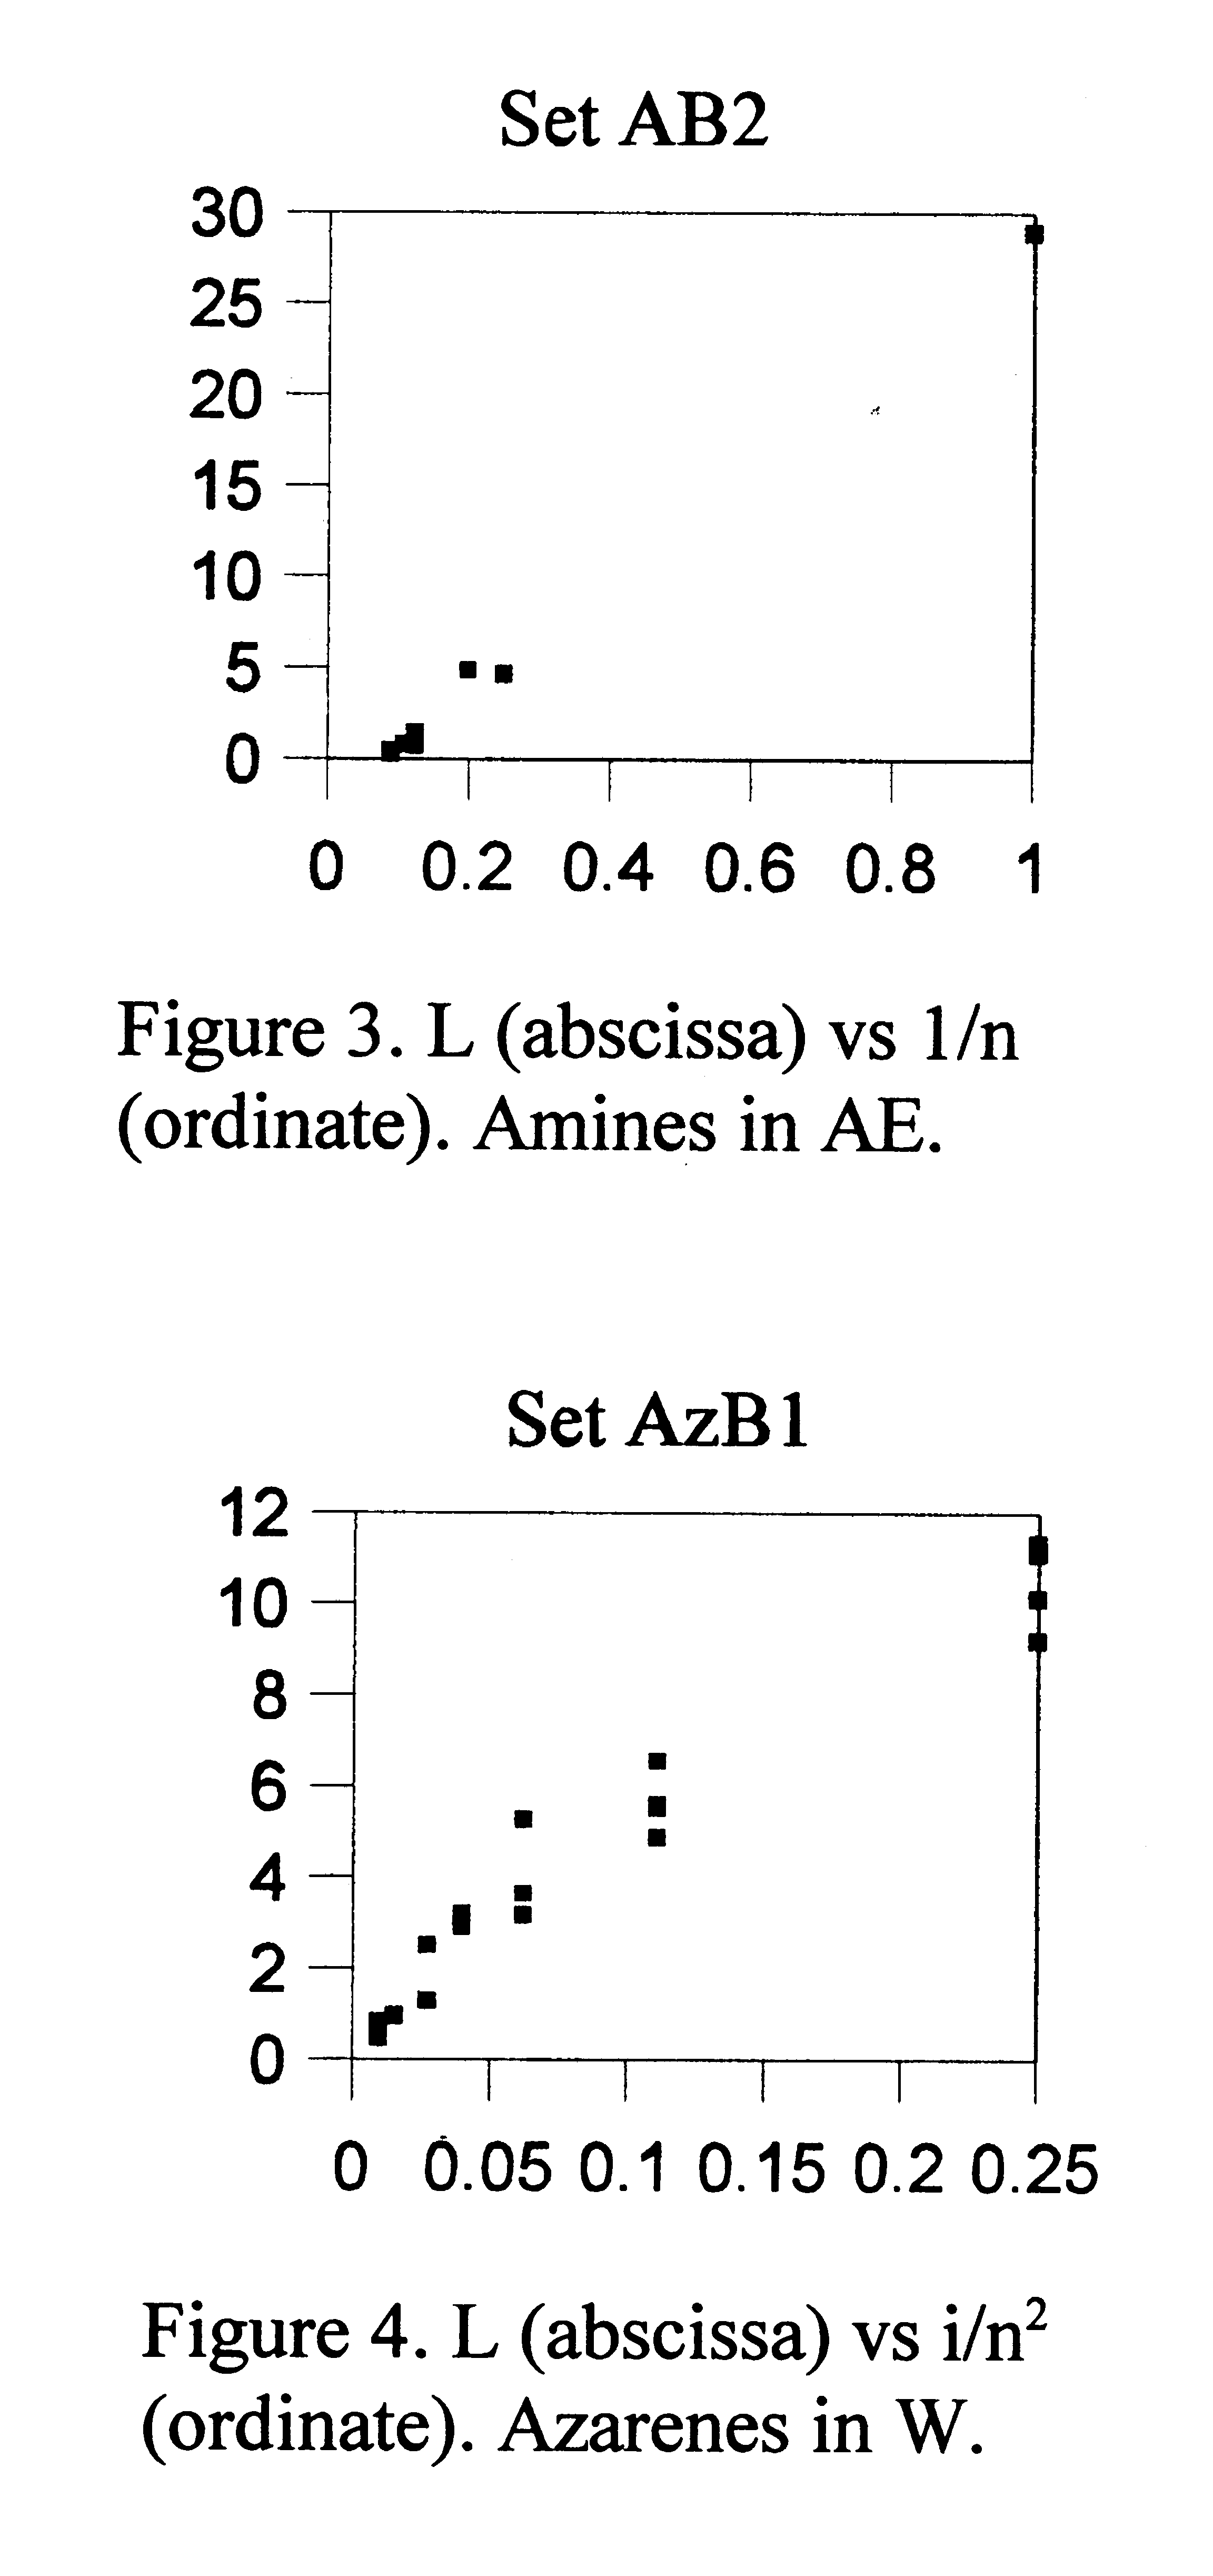


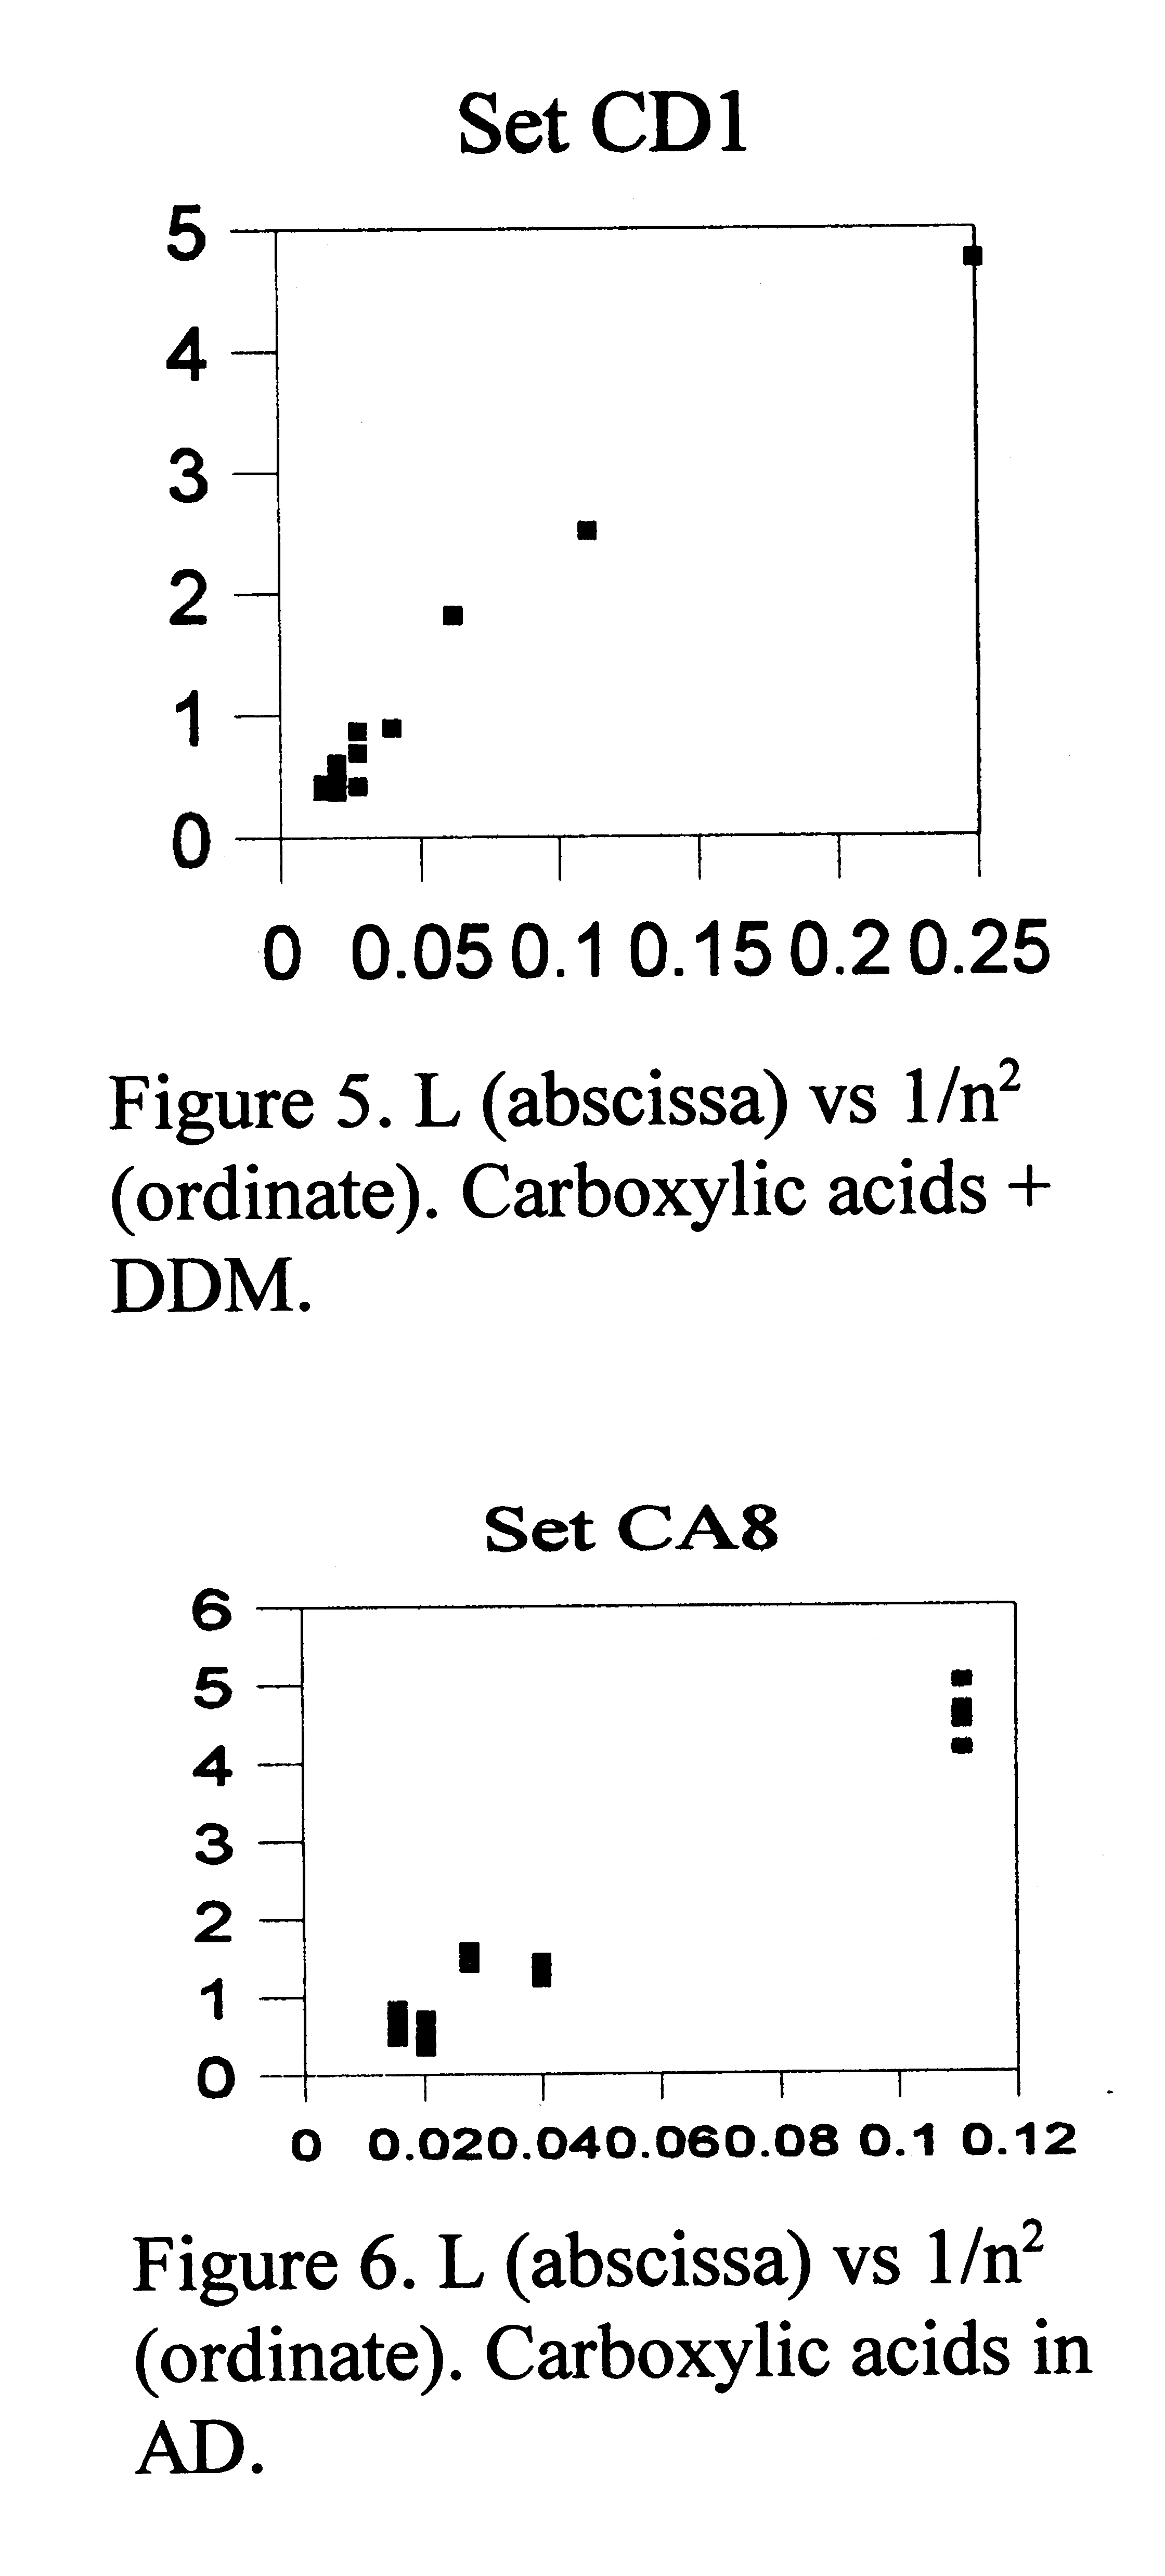


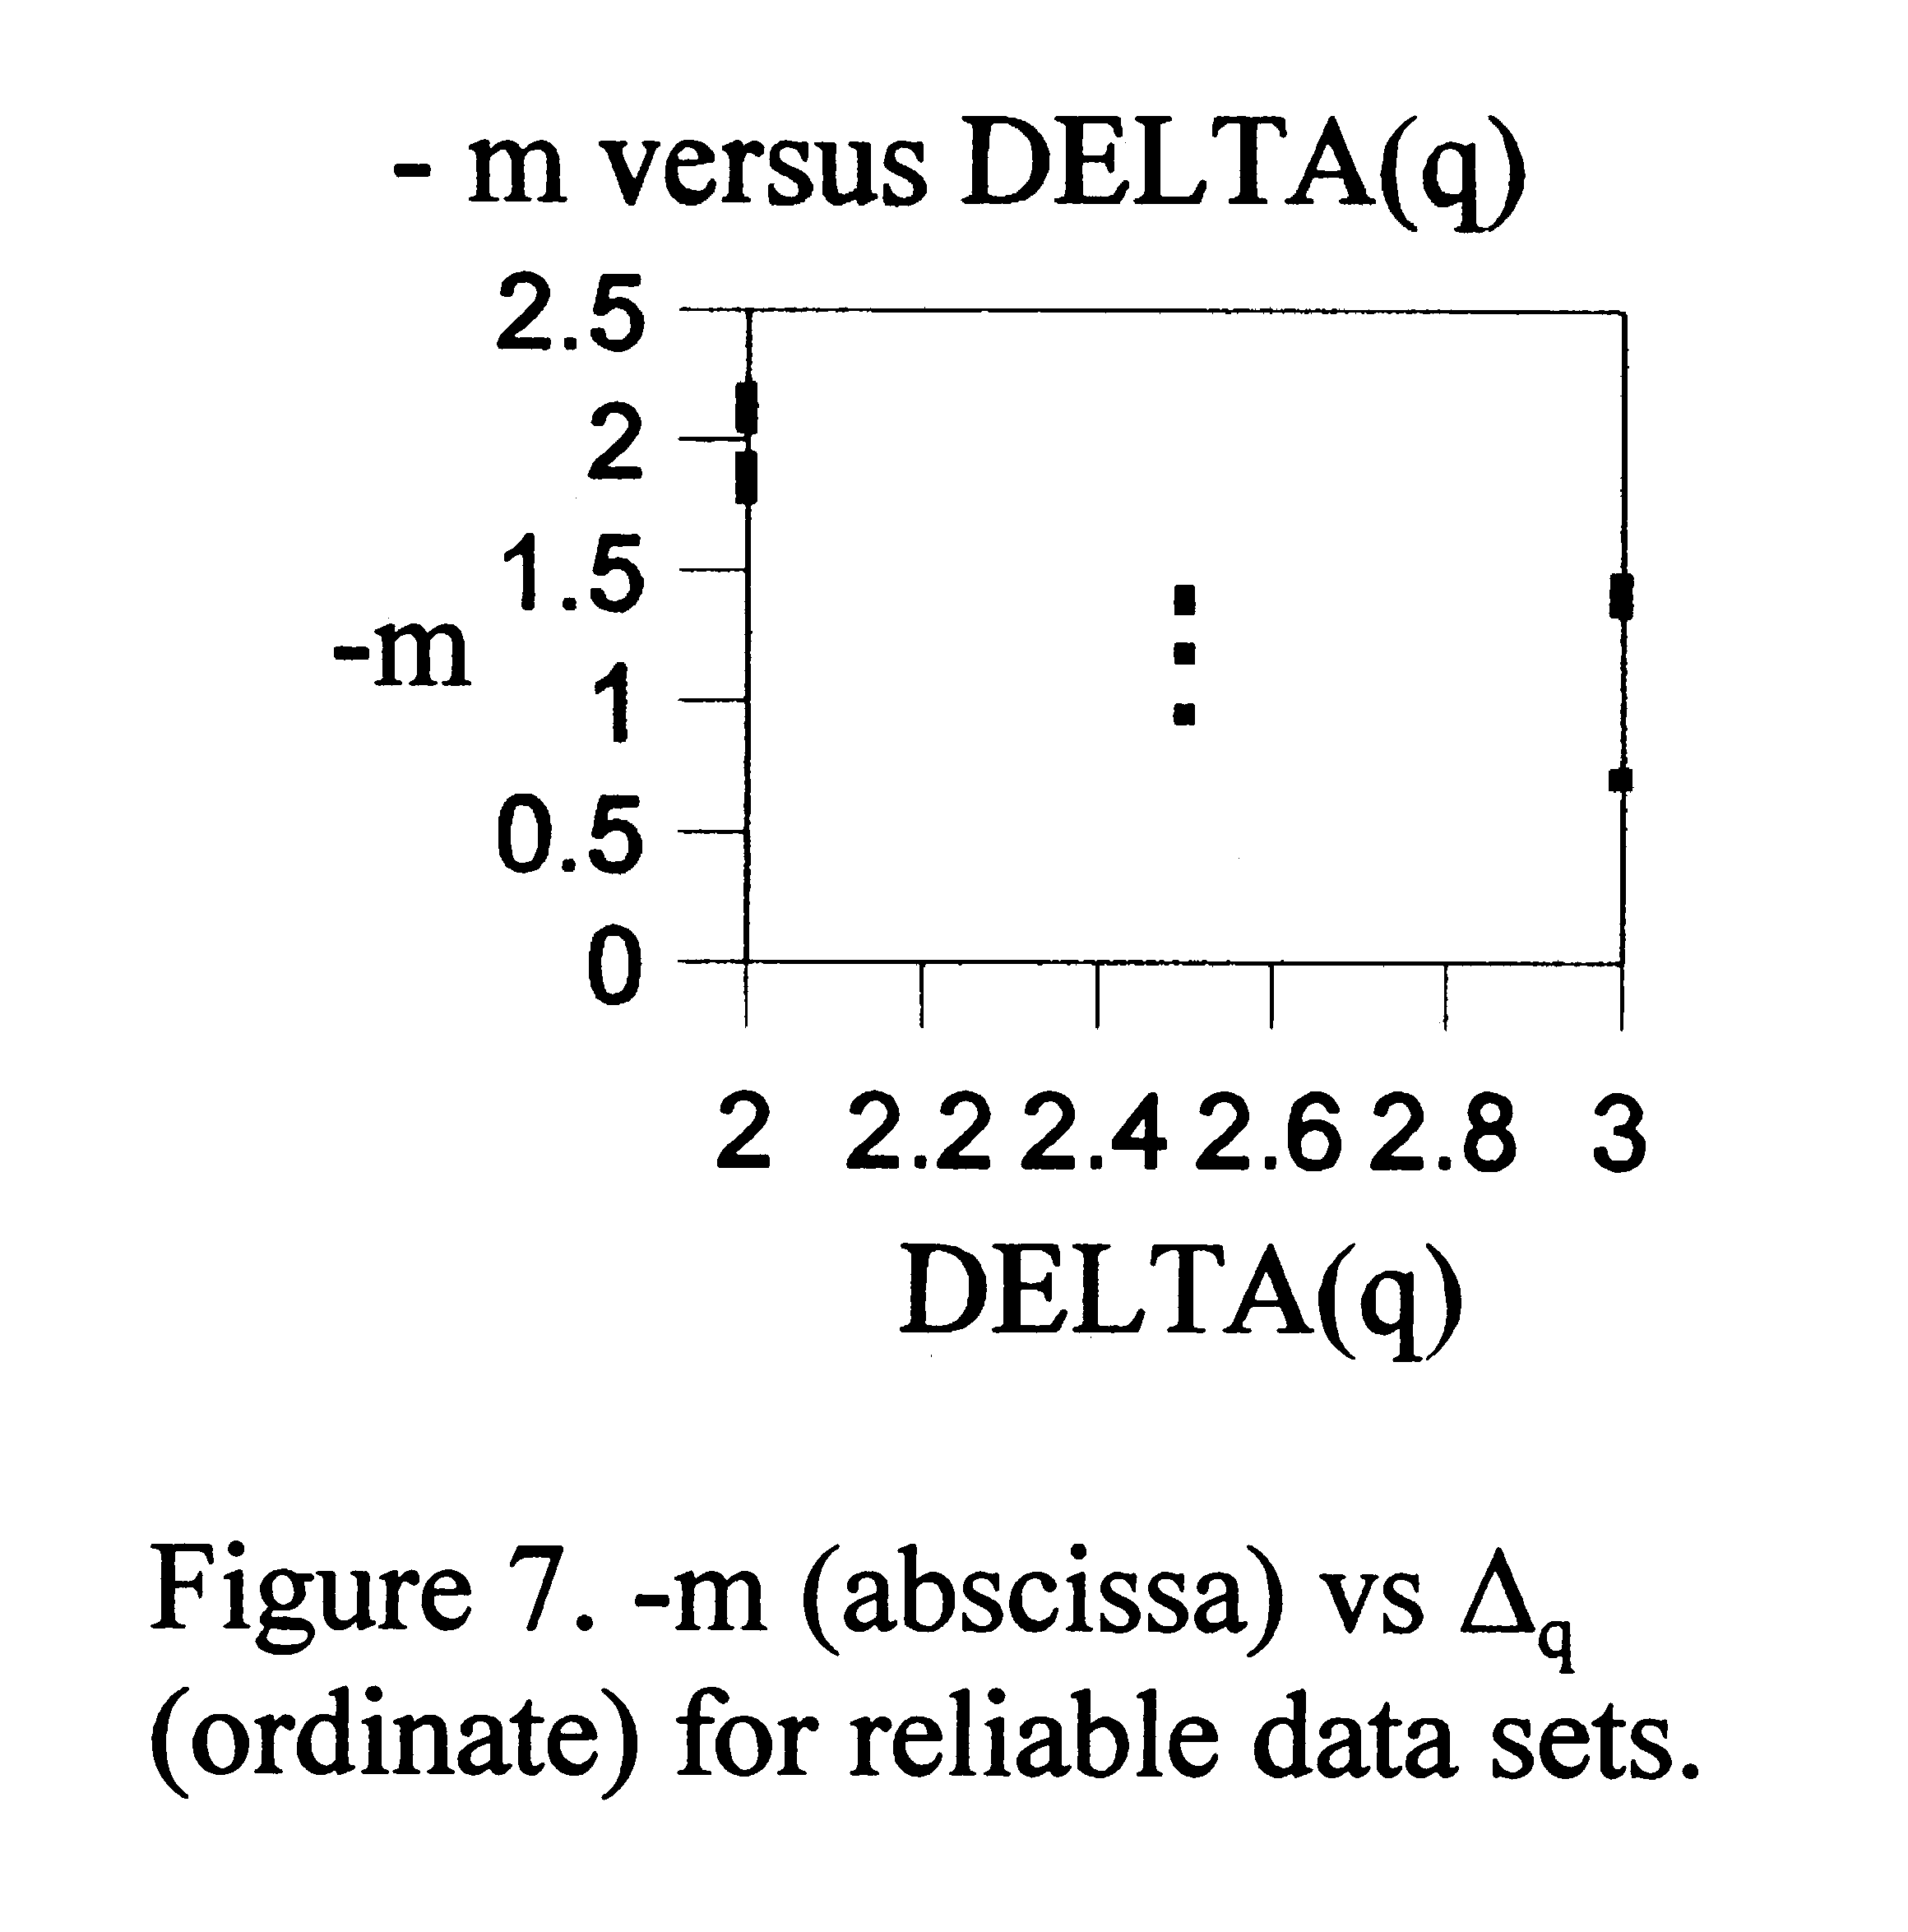

Supplement: Supplementary file 1 [file 901495k.doc]
